# Supplementary material for: The semi-synthetic flavonoid 2′,3′,4′-trihydroxyflavone (2-D08) inhibits both SN-38- and cytokine-evoked increases in epithelial barrier permeability in anin vitrointestinal mucositis model
Source: Royal Society of Chemistry journal article supplement (doi:10.1039/d2fo02458f), 2022-01-01
Supplement: d2fo02458f1.pdf [file d2fo02458f1.pdf]

## 1. Appendices

### Appendix 1. Concentration-response data for selected flavonoids and SN-38 in Caco-2 cells

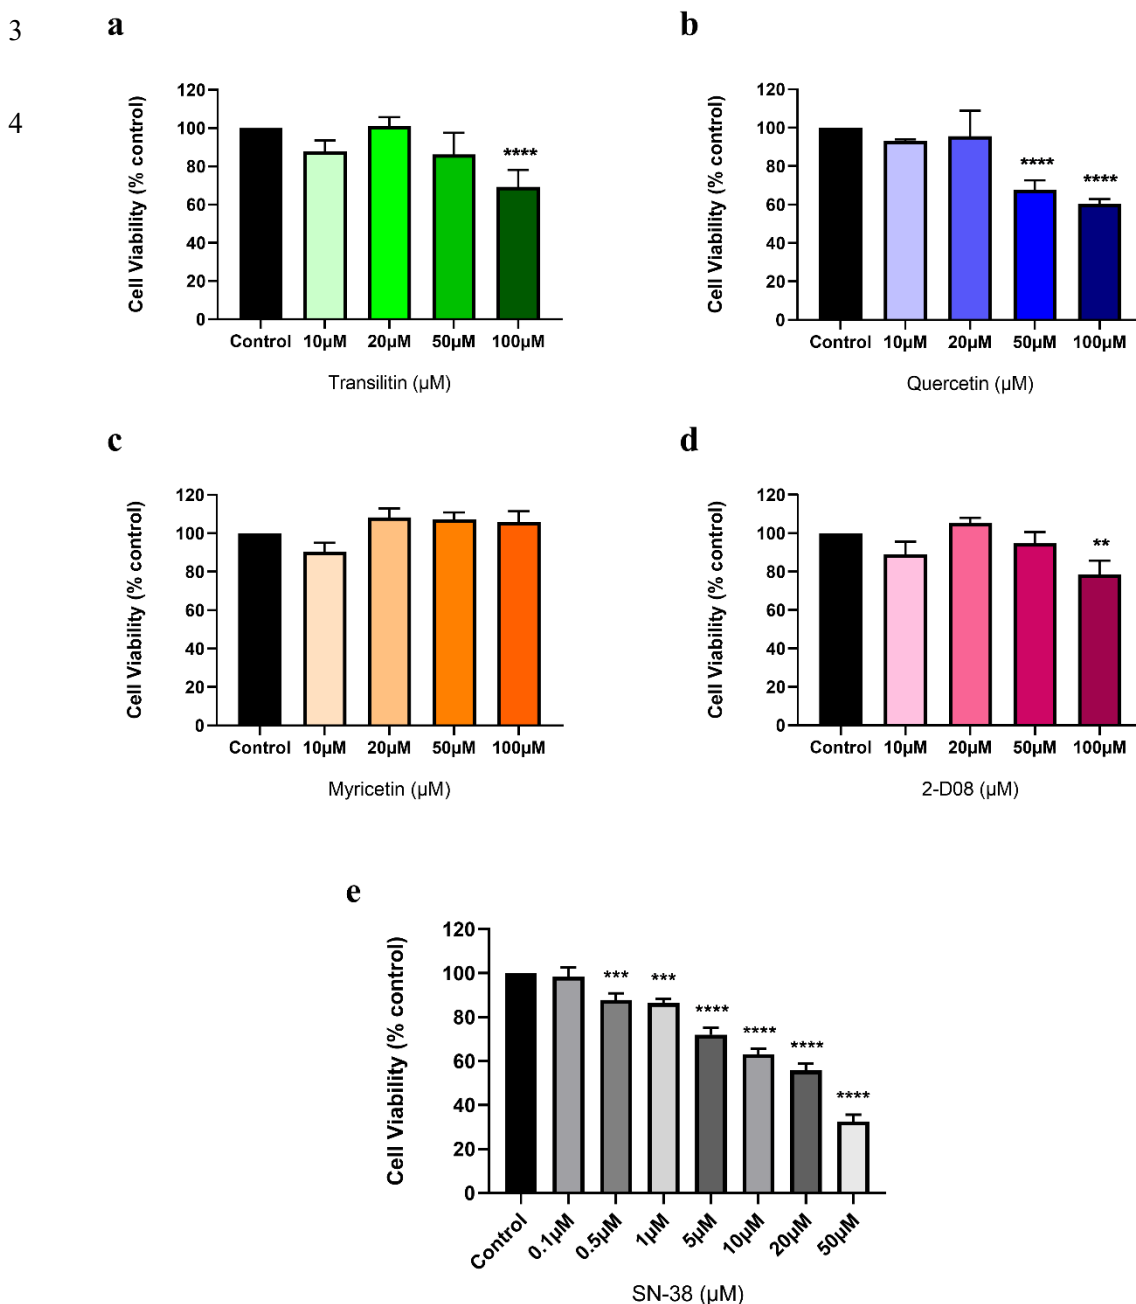

**Appendix 1.** MTT assay of Caco-2 cell viability following 48hr incubation with selected flavonoids (10-100  $\mu\text{M}$ ): **(a)** transilitin, **(b)** quercetin, **(c)** myricetin, **(d)** 2-D08 **(e)** SN-38 (0.1-50  $\mu\text{M}$ ). Data presented as mean  $\pm$  SD,  $n = 4$  independent experiments. Two-way ANOVA with Dunnett's post-hoc test vs control, \* $p < 0.05$ , \*\* $p < 0.01$ , \*\*\* $p < 0.001$ , \*\*\*\* $p < 0.0001$  vs vehicle.
